# Supplementary material for: Senescent stroma induces nuclear deformations in cancer cells via the inhibition of RhoA/ROCK/myosin II-based cytoskeletal tension
Source: PubMed Central journal article supplement — PNAS Nexus. 2022 Dec 6;2(1):pgac270. doi: 10.1093/pnasnexus/pgac270 (PMC9830950; doi:10.1093/pnasnexus/pgac270), 2022-12-06
Supplement: pgac270_supplemental_file.pdf [file pgac270_supplemental_file.pdf]

## Supplementary Material: Senescent stroma induces nuclear deformations in cancer cells via the inhibition of RhoA/ROCK/myosin II-based cytoskeletal tension

Ivie Aifuwa, Byoung Choul Kim, Pratik Kamat, Bartholomew Starich, Anshika Agrawal, Derin Tanrioven, Teresa R. Luperchio, Angela M. Jimenez Valencia, Tania Perestrelo, Karen Reddy, Taekjip Ha, Jude M. Philip

---

### Figure S1

**(a-b)** Fluorescent confocal micrographs of round (a) and elongated (b) MCF7 cells stained for F-actin (green), Lamin A (red) and nuclear DNA (blue) after exposure to Sen CM for 48h. Left and right panels display xy and yz equatorial cross-sections respectively. Whole cell images are displayed as insets per image. Scale bar, 10  $\mu$ m. **(c)** Averaged nuclear size for cells exposed to Sen CM after 48h. **(d)** Nuclear height of cells having round and elongated cell morphology using consequential z-slices; n=8 and n=10 respectively. **(e)** Binned correlation between cellular area and nuclear area. Blue triangle indicates an increase in cell area from left to right (elongated to round).

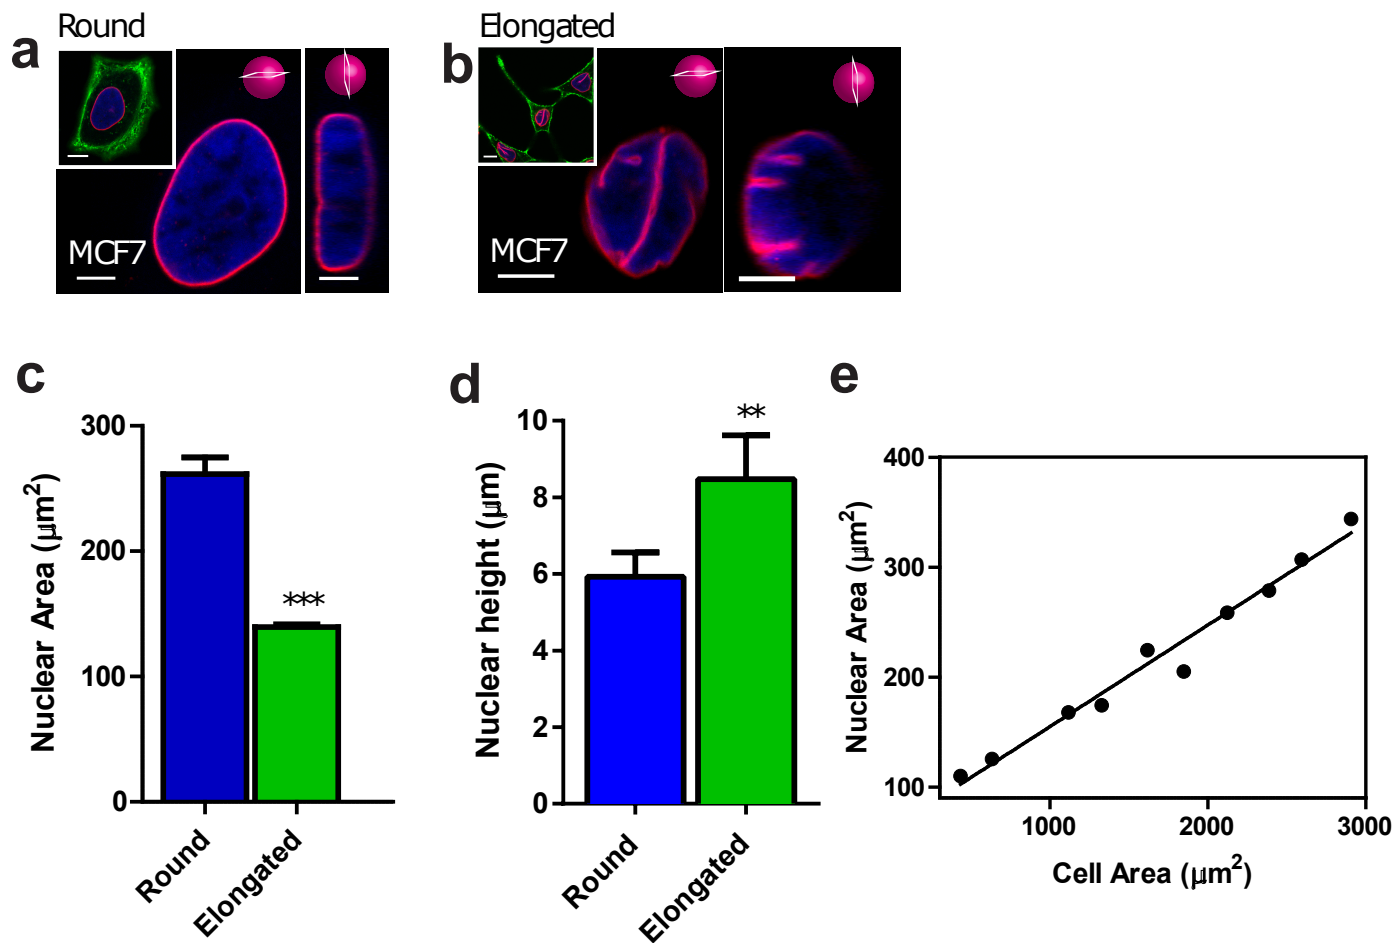

Figure S1

## Figure S2

Localization of nuclear lamina protein lamin A, nuclear envelope protein emerin, and LINC complex components Sun2, Nesprin2-giant, and Nesprin 3 in round and elongated T47D cells. Scale bar, 10  $\mu\text{m}$  **(b)** Western blot of T47D cells exposed to FM and Sen CM. The bands correspond to lamin A, Lamin C, Nesprin 2, and  $\beta$ -actin from top to bottom.

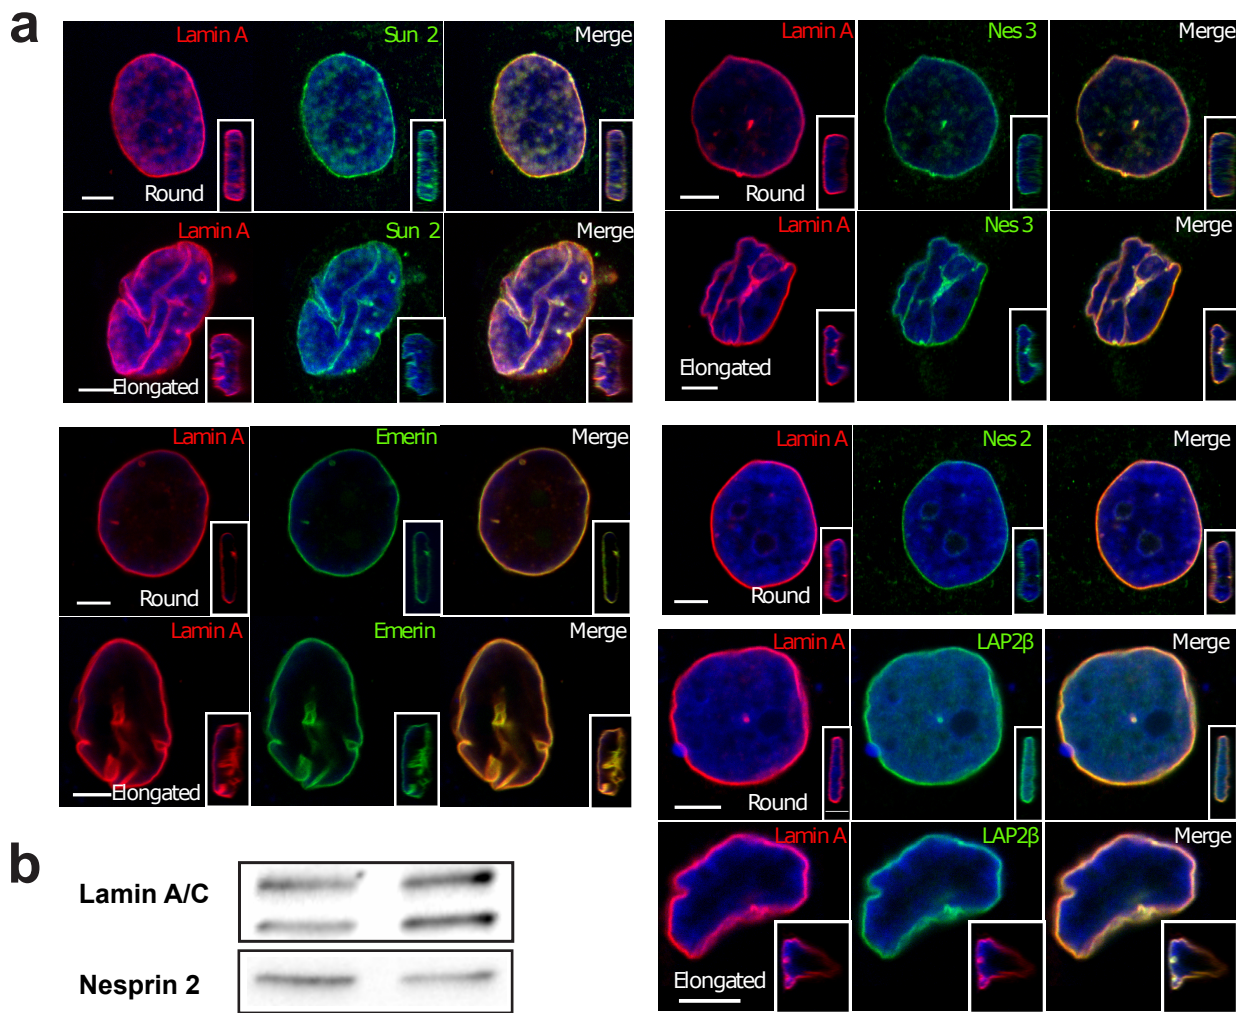

Figure S2



### Figure S3

**(a-b)** Fluorescence confocal micrographs of control and lamin A/C knockdown (262765) cells after stimulation with Sen CM (a) and FM (b) for 48h. Cells were stained with phalloidin, Lap2 $\beta$ , and Hoechst 33342 DNA stain. The following panels are zoomed in xy and yz cross-sections of the left panel. Scale bar 5  $\mu$ m. These include the xy and yz equatorial cross-sections respectively. **(c-e)** Percentage of control and lamin A/C knockdown cells having lobulated nuclei 48h after exposure to Sen CM and FM.

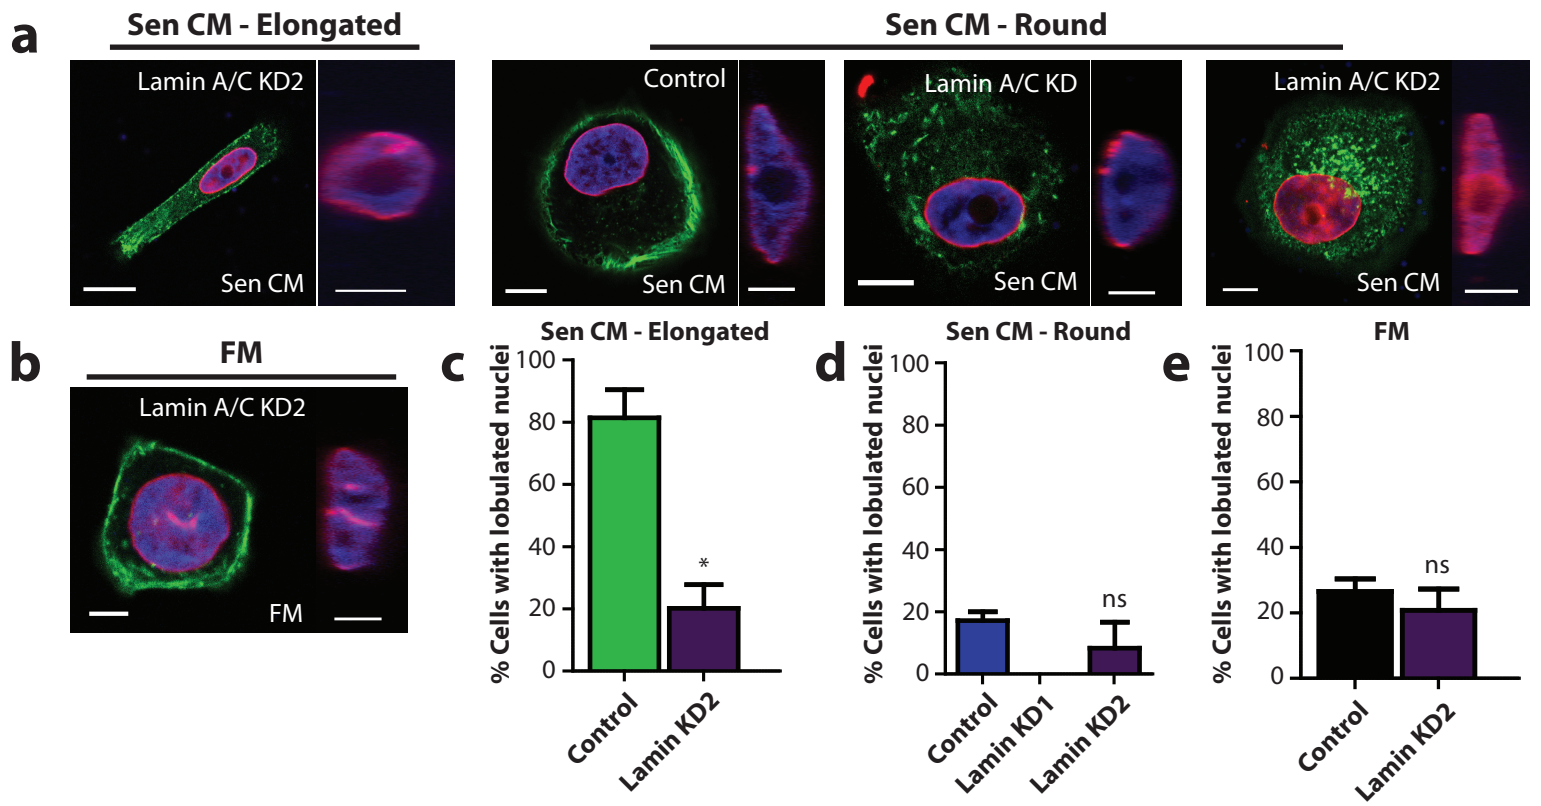

Figure S3

#### **Figure S4**

**(a-c)** Fluorescent confocal micrographs of T47D cells exposed to FM (a), Sen CM (b) and Sen CM +CN03 (c) then stained for vinculin, where blue boxes indicate zoomed region of T47D cells. Scale bar, 10  $\mu\text{m}$  in original image and 5  $\mu\text{m}$  in zoomed image. **(d)** distribution plot of cell circularity in each condition, 1 indicates a perfect circle on TGT surfaces.

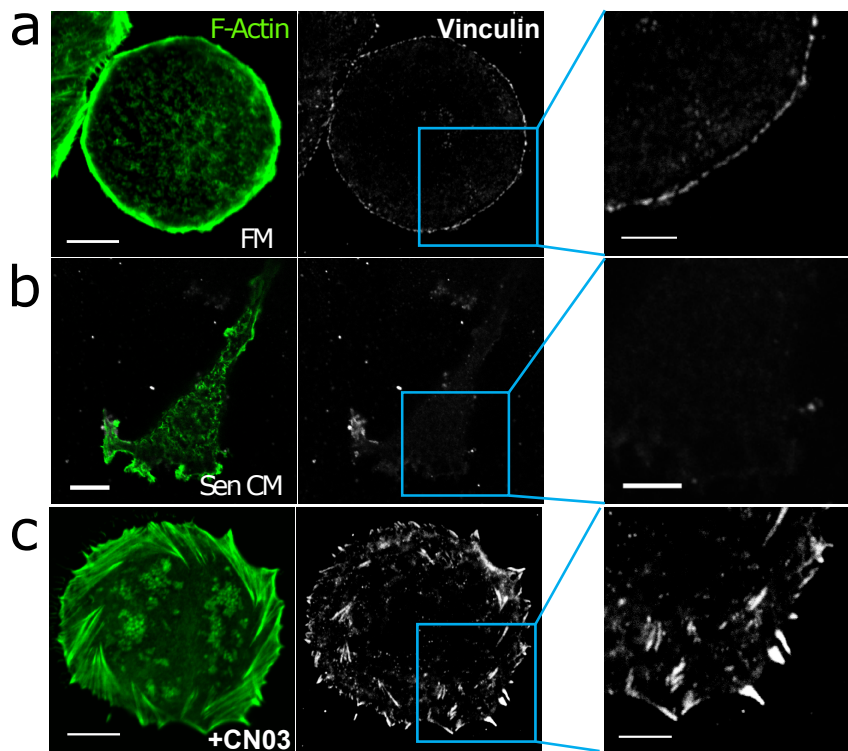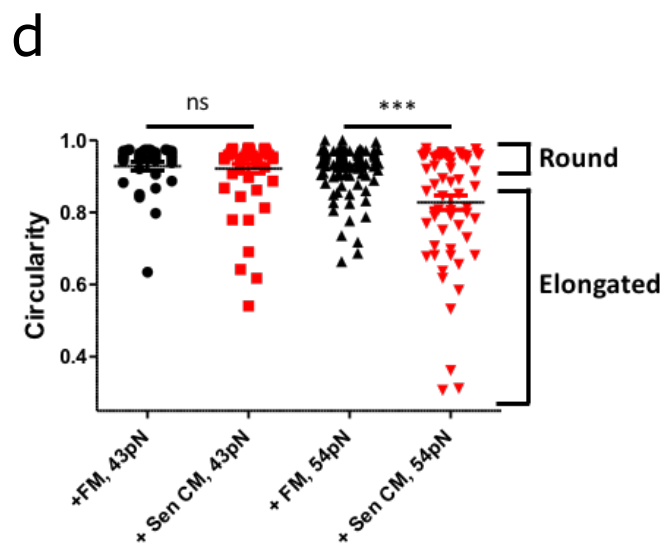

Figure S4

### **Figure S5**

**(a-b)** Fluorescent confocal micrographs of T47D cells exposed to FM **(a)** and FM +Bleb **(b)** then stained for vinculin, where blue boxes indicate zoomed region of T47D cells. Scale bar, 10  $\mu\text{m}$  in original image and 5  $\mu\text{m}$  in zoomed image. **(c)** Average cell area, **(d)** average nuclear area of cells exposed to FM and FM+Bleb after 48h. **(e)** Nuclear height of cells having round and elongated cell morphology using consequential z-slices; n=13 and n=15 respectively.

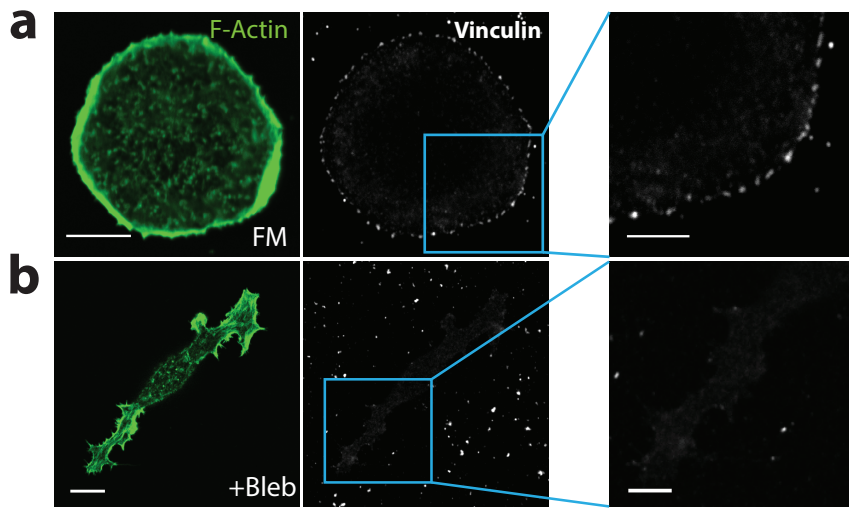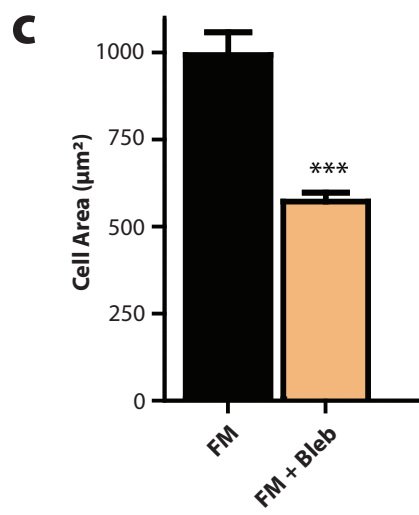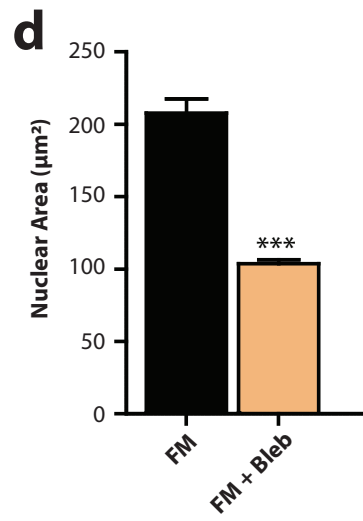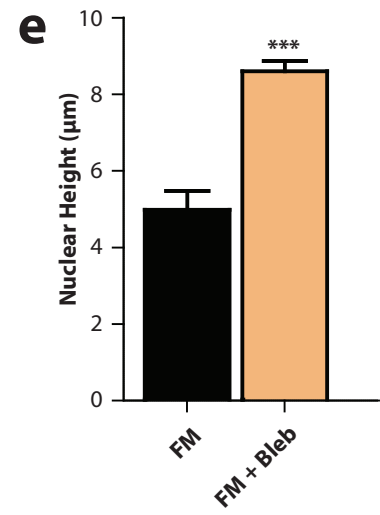

Figure S5

## Figure S6.

Fraction of cells with nuclear lobulation after exposure to Sen CM. **(a-c)** Bar plots showing the fraction of cells with lobulated nuclei for T47D cells treated with FM (n=109 cells), WI-38 CM (n=36 cells), and WI-38 veh (n=45 cells) (non-senescent WI-38 media) (a); T47D cells treated with GT125 FM=53 cells, GT125 CM=76 cells, WI-38 FM=181 cells, WI-38 CM=242 cells (b); T47D cells seeded on collagen-coated glass or collagen-coated 25kPa polyacrylamide hydrogel surfaces, Glass FM=109 cells, Glass CM=36 cells, 25 kPa FM=20 cells, and 25 kPa CM=21 cells (c). **(d)** Representative microscopy images of T47D cells treated with cytoskeletal modulators, FM, or non-senescent veh media, or seeded of glass or polyacrylamide surfaces. **(e)** Fraction of lobulated nuclei treated FM (60 cells), CM (181 cells), CM+JASP (85 cells), and CM+NOCO (91 cells). **(f)** Representative microscopy images of cancer cell lines (T47D, A375, and PANC-1) treated with non-senescent GT125 media (GT125 veh) or senescent GT125 CM. **(g-h)** Fraction of cells with lobulated nuclei treated with GT125 veh or GT125 CM, A375 (g), PANC-1 (h). A375 (GT125 FM=166 cells, GT125 CM=172 cells), and PANC-1 (GT125 FM=60 cells, GT125 CM=72 cells) **(i)** Bar plot showing the concentration of select interleukins in pg/ml. Secretions were collected from non-senescent GT125 and senescent GT125 fibroblasts.

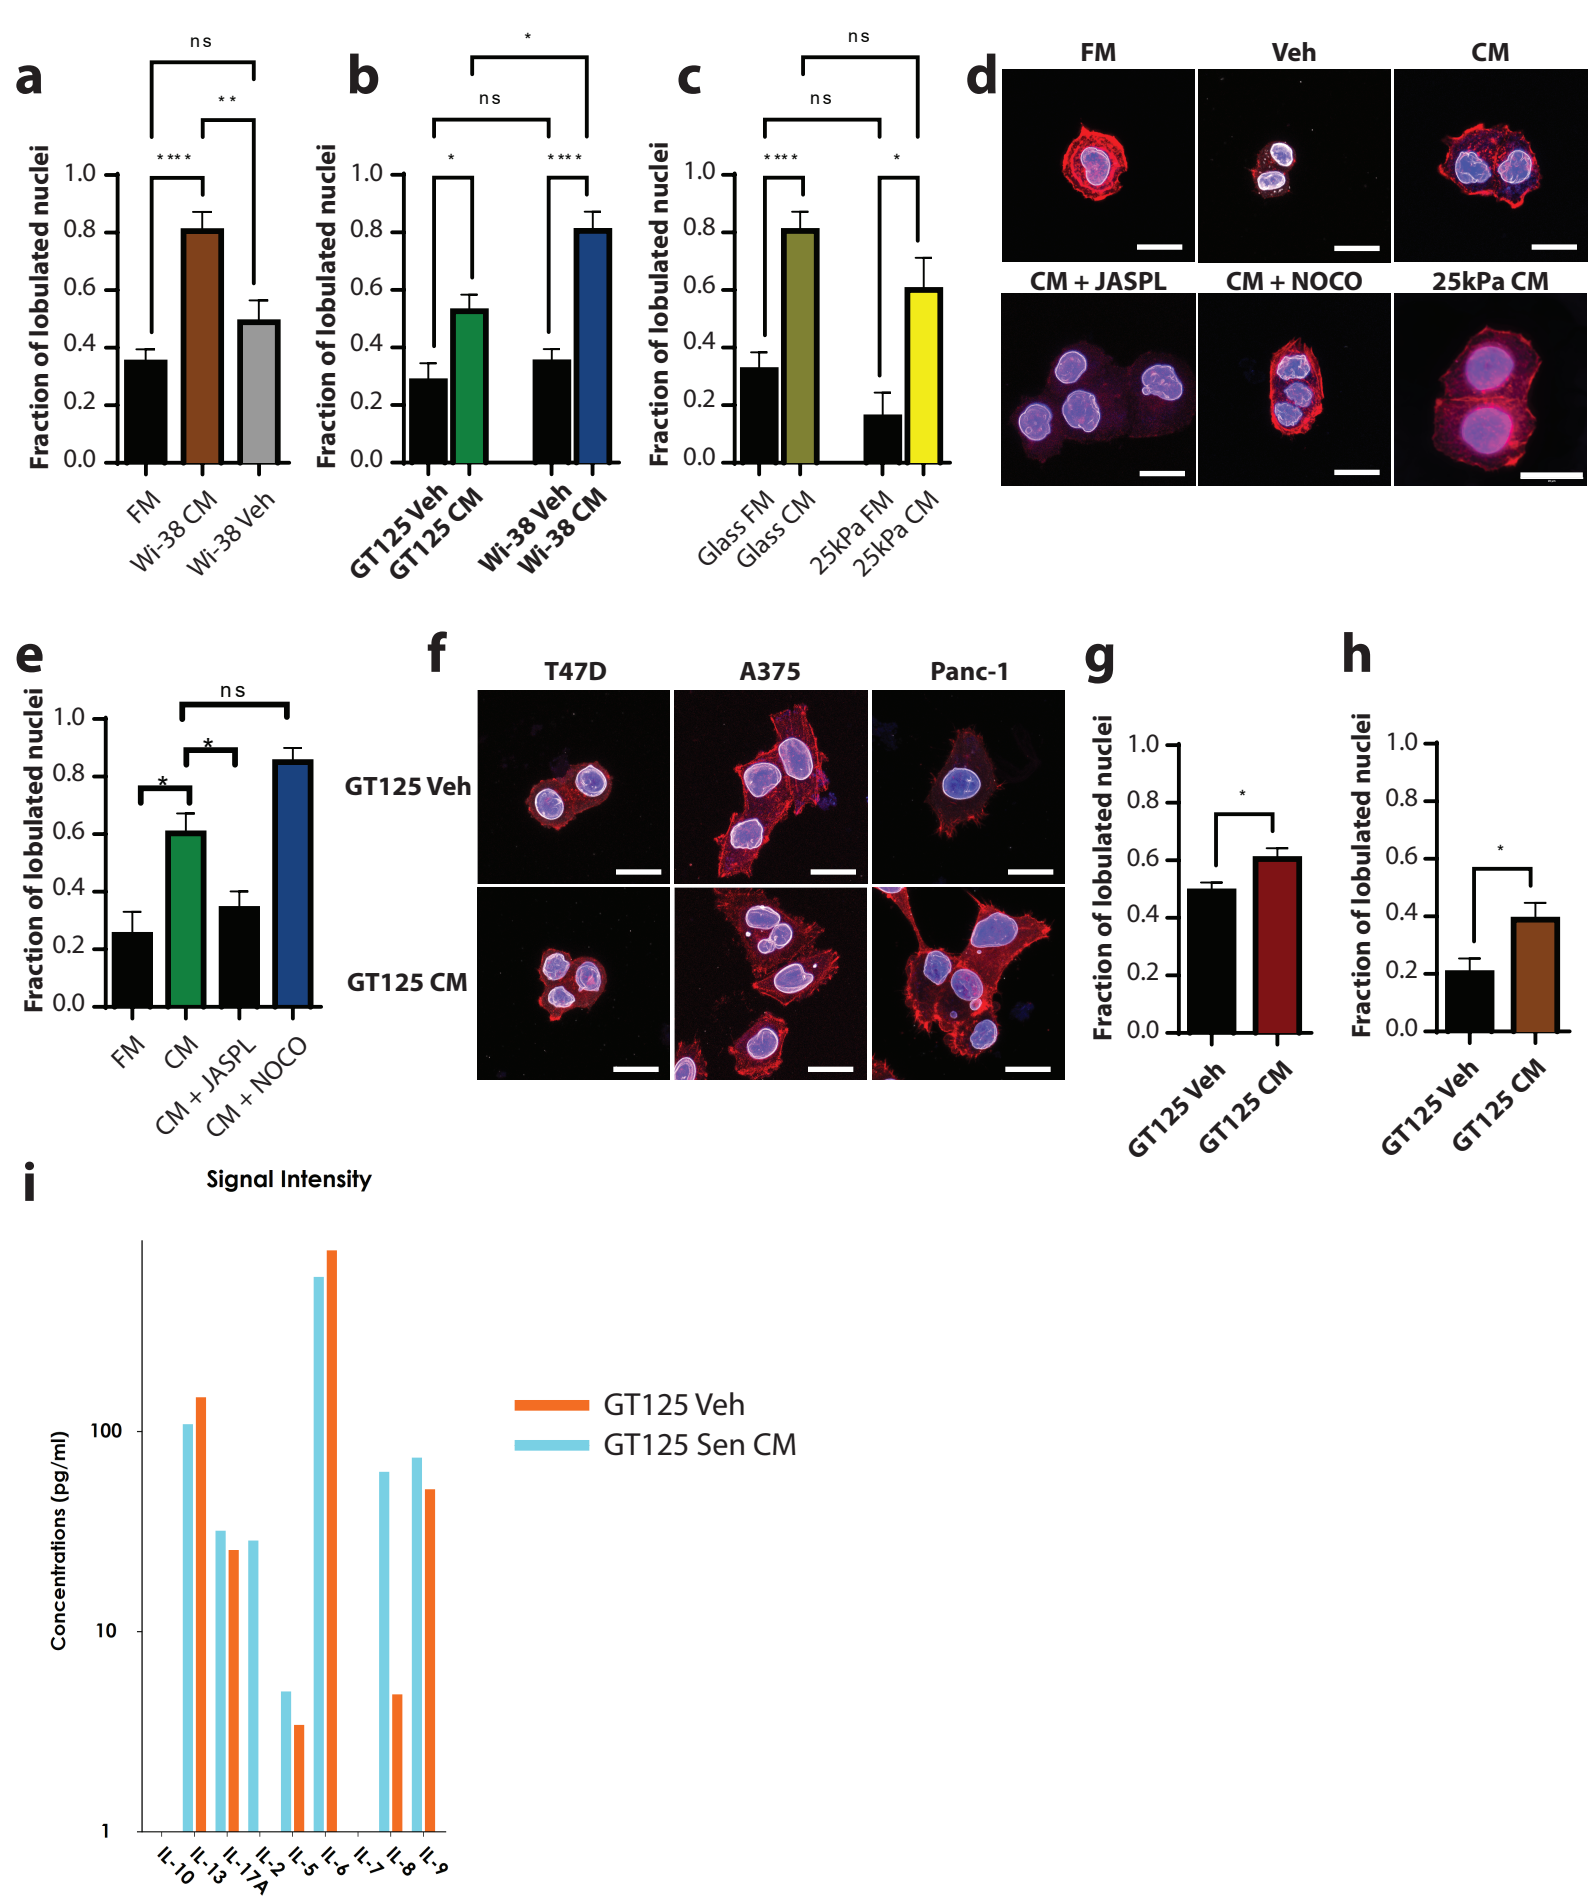

Figure S6
